# Supplementary material
Source: PubMed Central journal article supplement (PMC5571347)
Supplement: AAC.00762-17_zac009176470s1.pdf [file AAC.00762-17_zac009176470s1.pdf]

1 **FIGURES**

2

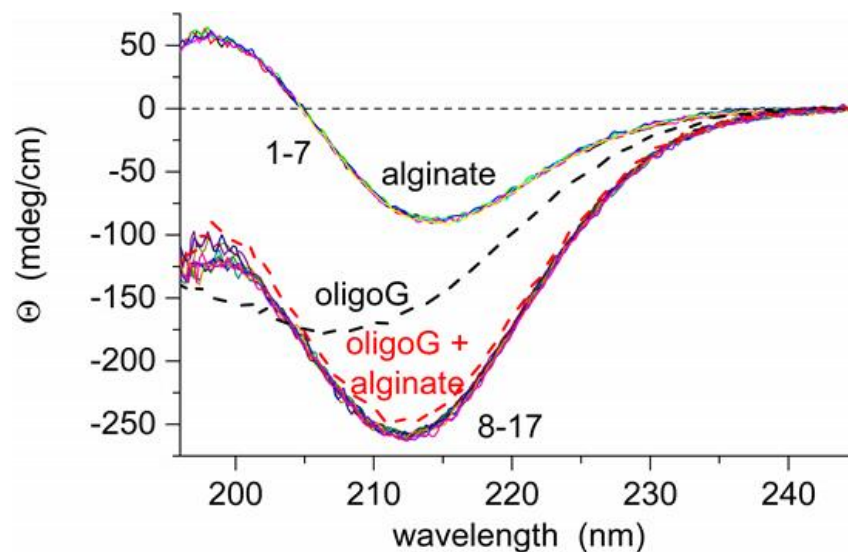

3

4 **FIG S1** Circular dichroism (CD) spectra of high Mw pseudomonal alginate mixed with OligoG CF-5/20. Scans 1-7 show spectra of high Mw  
5 alginate (~20  $\mu\text{M}$ ) followed over ~77 min upon heating from 4 to 37 $^{\circ}\text{C}$ ; scans 8-11 (~44min) are recorded after addition of OligoG CF-5/20 (850  
6  $\mu\text{M}$ ) followed by addition of  $\text{Ca}^{2+}$  (1mM) (scans 12-17, ~ 66min). Spectra of OligoG CF-5/20 (850  $\mu\text{M}$ ) alone and its sum with high Mw alginate  
7 (20  $\mu\text{M}$ ) are shown as black and red dashed lines, respectively.

8

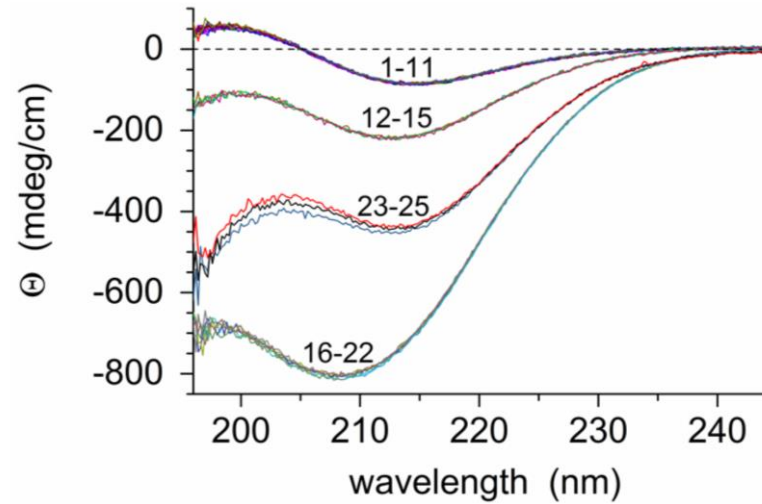

10

11 **FIG S2** CD spectra of high Mw pseudomonas alginate mixed with OligoG CF-5/20. Scans 1-2 show spectra of high Mw alginate (~20  $\mu$ M)  
 12 followed over ~20 min after heating from 4 to 37°C, after which  $\text{Ca}^{2+}$  was added to a final concentration of 1mM (scans 3-8) and 2 mM (scans  
 13 9-11). Oligo G CF-5/20 was added to  $c_{\text{fin}} = 700\mu\text{M}$  (scans 12-15; molar ratio high Mw alginate to OligoG CF-5/20 1:50) and  $c_{\text{fin}} = 4.2\text{mM}$  (scans  
 14 16-22; molar ratio high Mw alginate to OligoG CF-5/20 1:600. Adding calcium to  $c_{\text{fin}} = 9 \text{mM}$  results in spontaneous alginate precipitation (scans  
 15 23-25).

16

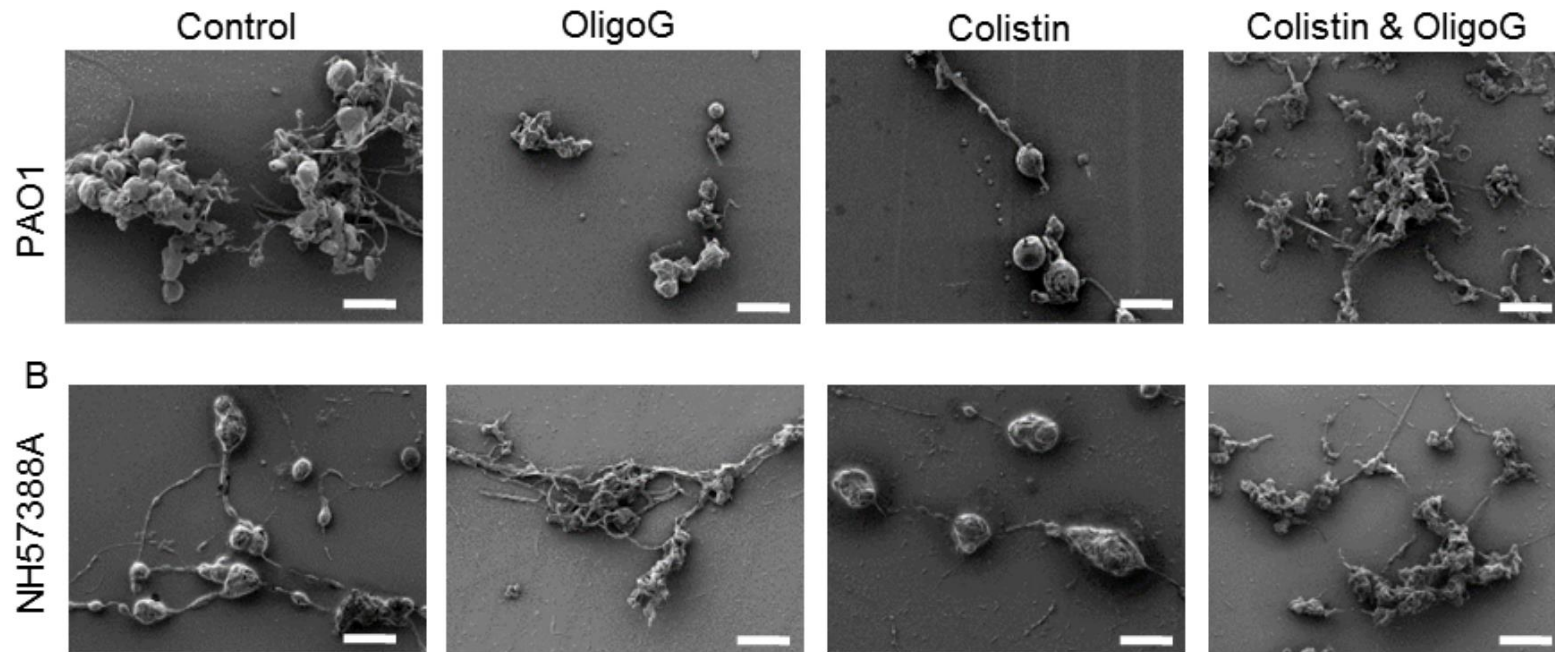

17

18 **FIG S3** Biofilm disruption assay showing SEM images of established (24 h) *P. aeruginosa* (A) PAO1 and (B) NH57388A biofilms treated for 24  
 19 h with 2% OligoG CF-5/20 ± colistin (16 µg/ml). Scale bar 20 µm.

20
